# Supplementary material for: Oral Gene Therapy of HFD-Obesity via Nonpathogenic Yeast Microcapsules Mediated shRNA Delivery
Source: MDPI journal article supplement (doi:10.3390/pharmaceutics13101536), 2021-09-22
Supplement: s1 [file s1]

# Supplementary Materials: Oral Gene Therapy of HFD-obesity *via* Nonpathogenic Yeast Microcapsules Mediated shRNA Delivery

Li Zhang, Wan Zhang, Hang Peng, Yankun Li, Tongtong Leng, Chenxi Xie and Long Zhang

Table S1. The sequences of *IL-1 $\beta$*  shRNA and its target sites.

| shRNA Name                            | Sequence (5' to 3')                                                                               | Target Site (5' to 3')  |
|---------------------------------------|---------------------------------------------------------------------------------------------------|-------------------------|
| <i>IL-1<math>\beta</math></i> shRNA 1 | <b>GACAGAATATCAACCAACA</b> ATAG <b>GTGAAGCCACAGAT</b> GTAT <b>TG</b><br><b>TTGGTTGATATTCTGT</b>   | ATGGACAGAATATC<br>AACCA |
| <i>IL-1<math>\beta</math></i> shRNA 2 | <b>CACATTCTGTTCAAAGAGAG</b> TAG <b>GTGAAGCCACAGAT</b> GTACT <b>TCT</b><br><b>CTTTGAACAGAATGTG</b> | TGGCACATTCTGTT<br>CAAAG |
| <i>IL-1<math>\beta</math></i> shRNA 3 | <b>CATTGAAGCTGAGAATAAA</b> TTAG <b>GTGAAGCCACAGAT</b> GTAA <b>TT</b><br><b>TATTCTCAGCTTCAATG</b>  | TTTCATTGAAGCTG<br>AGAAT |

Notes: **Bold** sequence refers to the functional sequence of shRNA and *italic* sequence refers to the loop structure of shRNA.

Table S2. Average net weight gain per week (g).

|                          | week 1 | week 2 | week 3 | week 4 | week 5 |
|--------------------------|--------|--------|--------|--------|--------|
| NCD ( <i>n</i> = 5)      | 0      | -5.90  | -1.38  | -0.14  | -0.40  |
| HFD-Ctrl ( <i>n</i> = 5) | 0      | -0.02  | 0.94   | 1.74   | 2.19   |
| HFD-Exp ( <i>n</i> = 7)  | 0      | -1.91  | -1.51  | -1.03  | -0.11  |

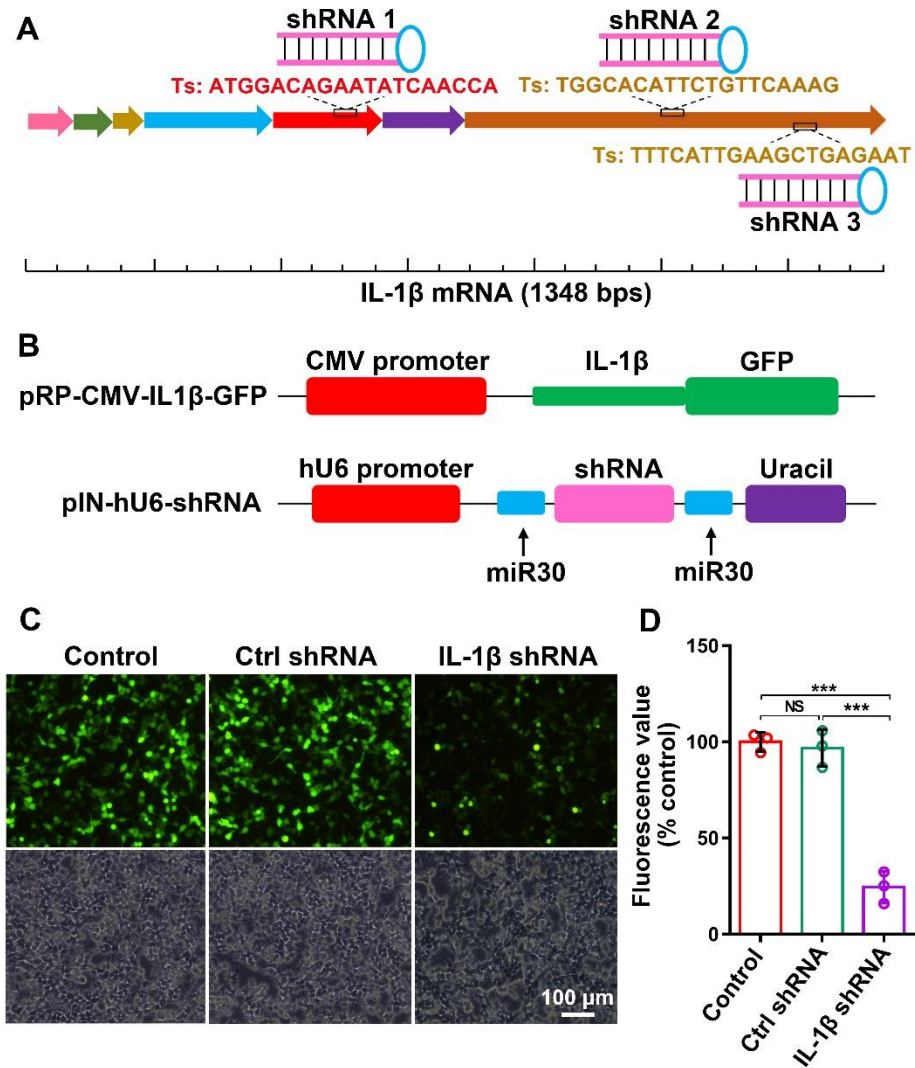

**Figure S1.** Information of shRNA expression vector and efficiency detection of *IL-1 $\beta$*  shRNA in 293T cells in vitro. **(A)** The shRNA target sites and target sequences (Ts) on the *IL-1 $\beta$*  mRNA. **(B)** The structure of pRP-CMV-IL1 $\beta$ -GFP (pRP) and pIN-hU6-shRNA plasmid. **(C)** Functional detection of *IL-1 $\beta$*  shRNA in 293T cells ( $n = 3$ ). **(D)** Fluorescence intensity. Data was expressed as mean  $\pm$  SD. NS (no significance), \*\*\*  $P < 0.001$ .

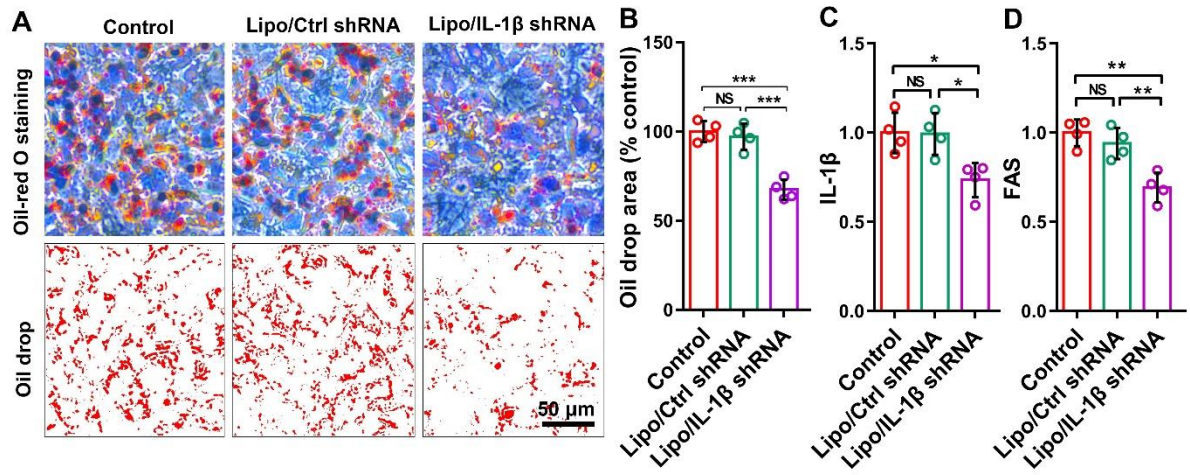

**Figure S2.** *IL-1β* shRNA increased lipid metabolism in adipocytes. The function of *IL-1β* shRNA on inhibition of fat expression was evaluated by Oil-Red O Staining and RT-qPCR. (A) Oil-Red O Staining and oil drop area. (B) Percentage of oil drop area. (C–D) Expression of fat related genes *IL-1β* and *FAS*. NS (no significance). \*  $P < 0.05$ , \*\*  $P < 0.01$ , \*\*\*  $P < 0.001$  ( $n = 4$ ).

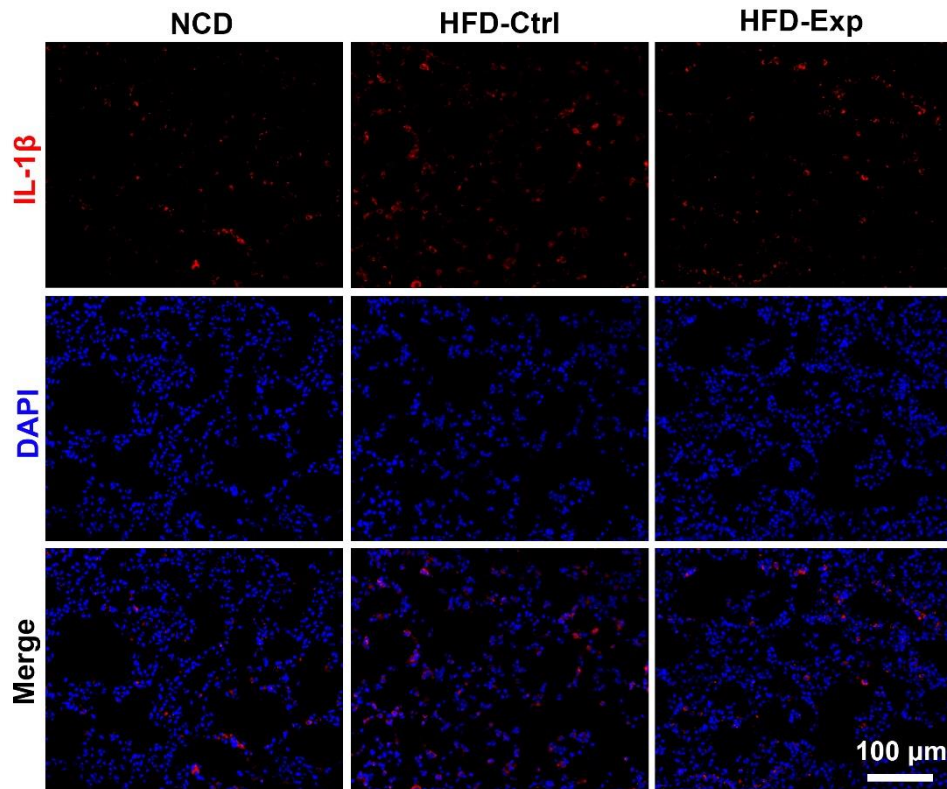

**Figure S3.** Oral administration of *IL-1 β* shRNA/yeast inhibits lung *IL-1β* expression. Immunofluorescence staining of *IL-1β* (red) in the lung tissue. DAPI nuclear staining (blue) was also conducted ( $n = 4$ ).

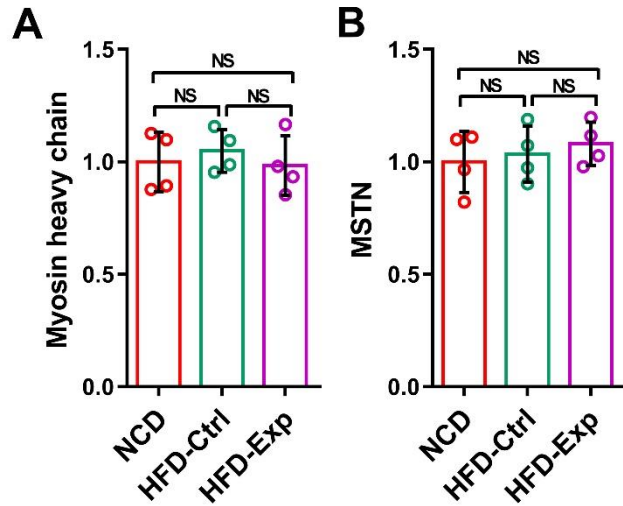

**Figure S4.** *IL-1 $\beta$*  shRNA/yeast has no effect on myosin heavy chain and myostatin (MSTN) expression in muscle. The expression of MHC (A) and MSTN (B) in muscle. Data was expressed as mean  $\pm$  SD. NS (no significance) ( $n = 4$ ).

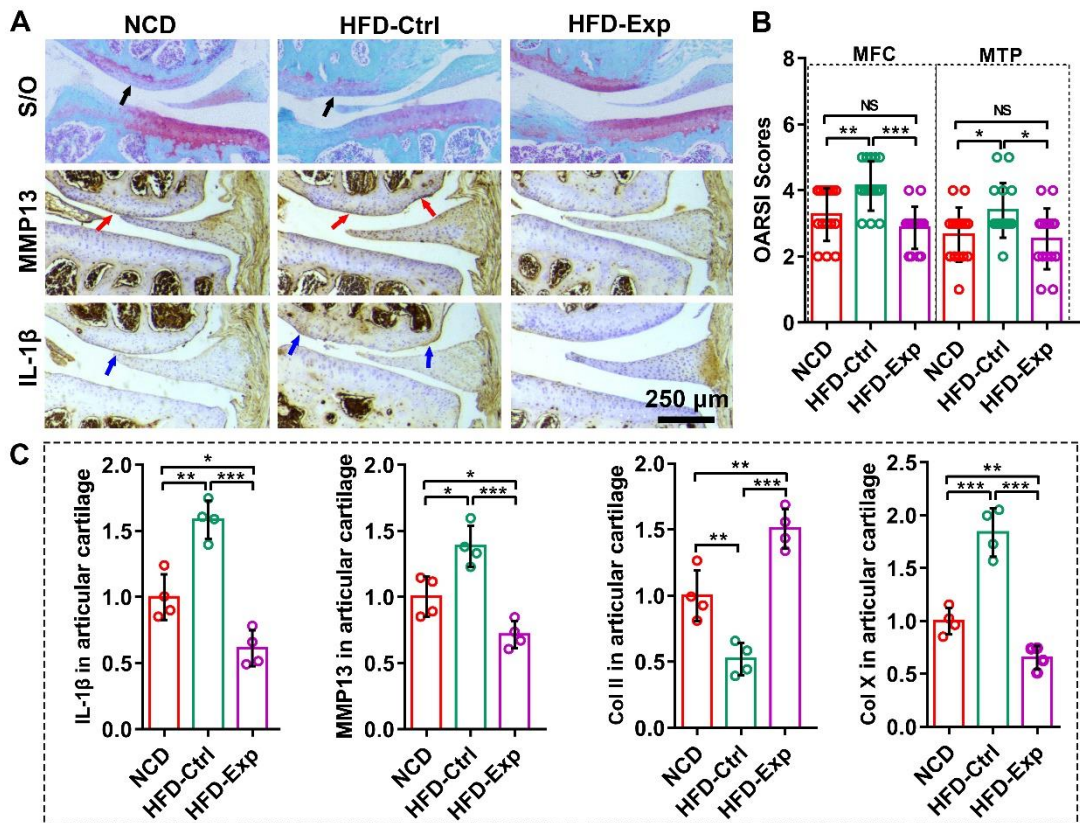

**Figure S5.** Inhibition of weight gain alleviated articular cartilage injury. (A) Safranin O/Fast Green and immunohistochemistry staining of knee joint. (B) Articular cartilage damage scores of the medial tibial plateau (MTP) and medial femoral condyle (MFC) were assessed using OARSI criteria ( $n = 15$ ). (C) Related gene expression of cartilage formation or degradation in the knee joint ( $n = 4$ ). NS (no significance). \*  $P < 0.05$ , \*\*  $P < 0.01$ , \*\*\*  $P < 0.001$ .
